# Supplementary material
Source: publisher figshare collection journal article supplement (https://acs.figshare.com/ndownloader/files/5682690)

# CHEMISTRY OF MATERIALS

Chem. Mater., 1997, 9(5), 1068-1070, DOI: [10.1021/cm970044f](https://doi.org/10.1021/cm970044f)

## Terms & Conditions

Electronic Supporting Information files are available without a subscription to ACS Web Editions. The American Chemical Society holds a copyright ownership interest in any copyrightable Supporting Information. Files available from the ACS website may be downloaded for personal use only. Users are not otherwise permitted to reproduce, republish, redistribute, or sell any Supporting Information from the ACS website, either in whole or in part, in either machine-readable form or any other form without permission from the American Chemical Society. For permission to reproduce, republish and redistribute this material, requesters must process their own requests via the RightsLink permission system. Information about how to use the RightsLink permission system can be found at

<http://pubs.acs.org/page/copyright/permissions.html>

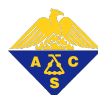

**ACS Publications**

MOST TRUSTED. MOST CITED. MOST READ.

Copyright © 1997 American Chemical Society

**Supplemental Material**

$^{19}\text{F}$  MAS NMR spectra were simulated in order to demonstrate the effect of fast F1-F1 motion on the spectra. At each temperature, the fraction of mobile F3 ions (from Figure 2) was input into the simulations. These F3 ions then undergo exchange with nearby F1 ions with  $\tau_c < 3.3 \times 10^{-5}$  s. Linebroadenings equal to those of the "F1" and rigid F3 resonance (Figure 1) were used in the simulations. Three simulations are shown for each temperature: Case 1 shows the spectrum under conditions of fast F1-F1 motion, Case 2 shows the spectrum under conditions of no F1-F1 exchange and "No Exchange" shows the spectrum under neither F1-F3 or F1-F1 exchange.

2

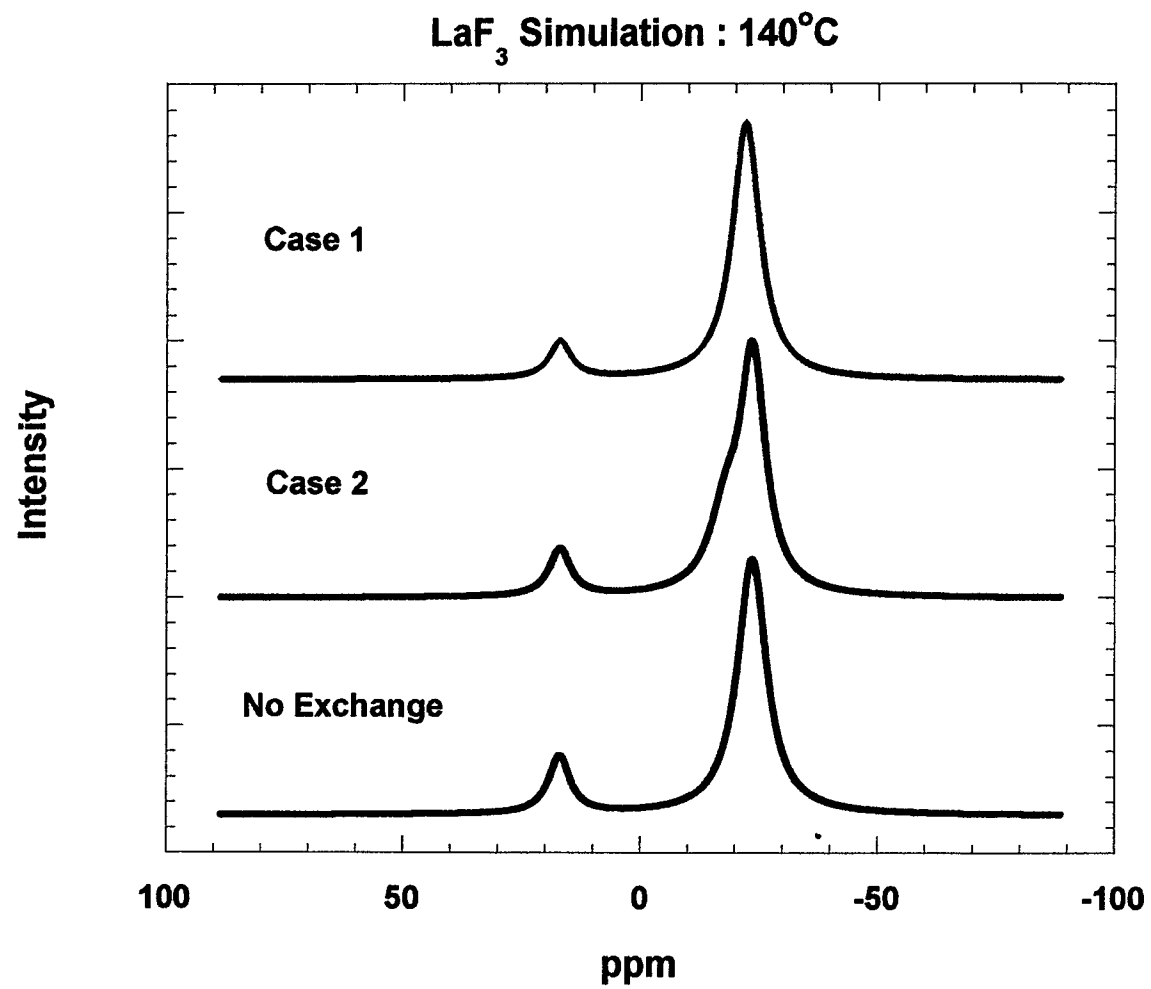

LaF<sub>3</sub> Simulation : 198°C

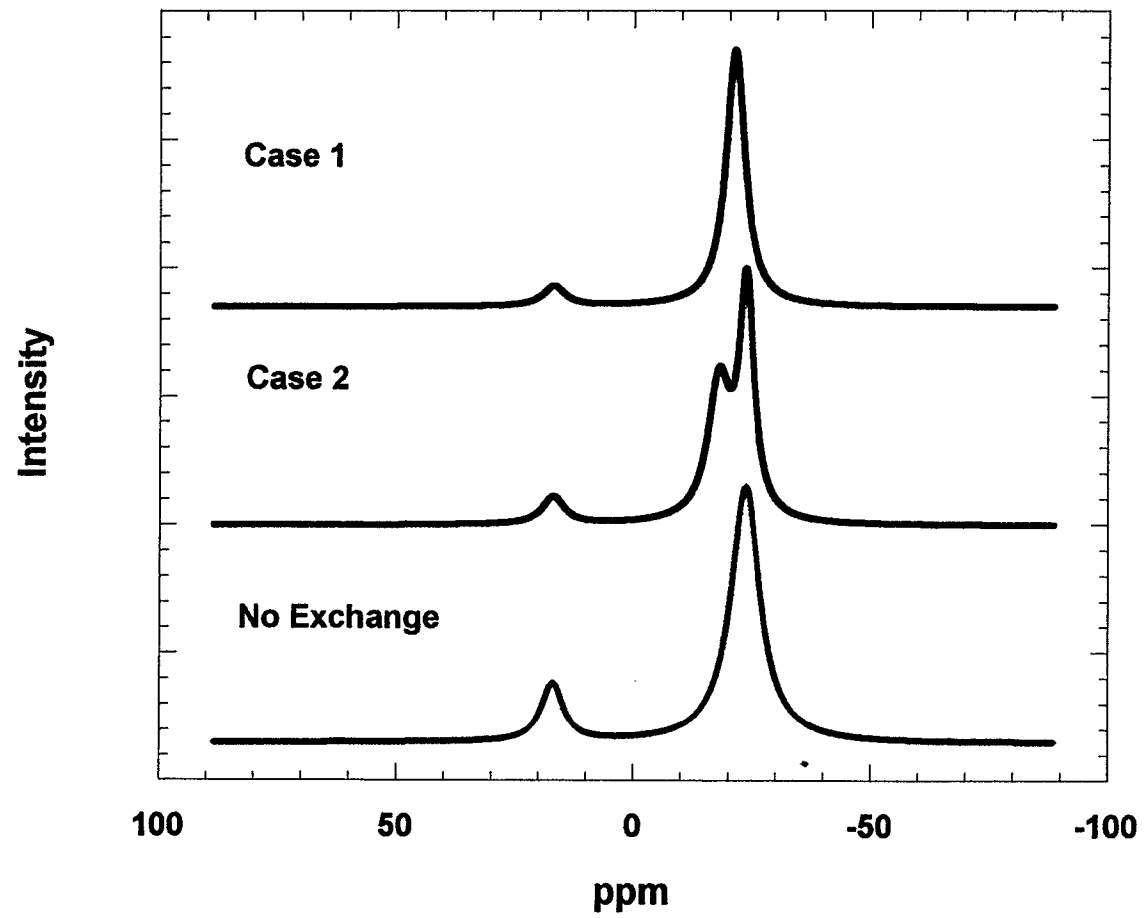

4

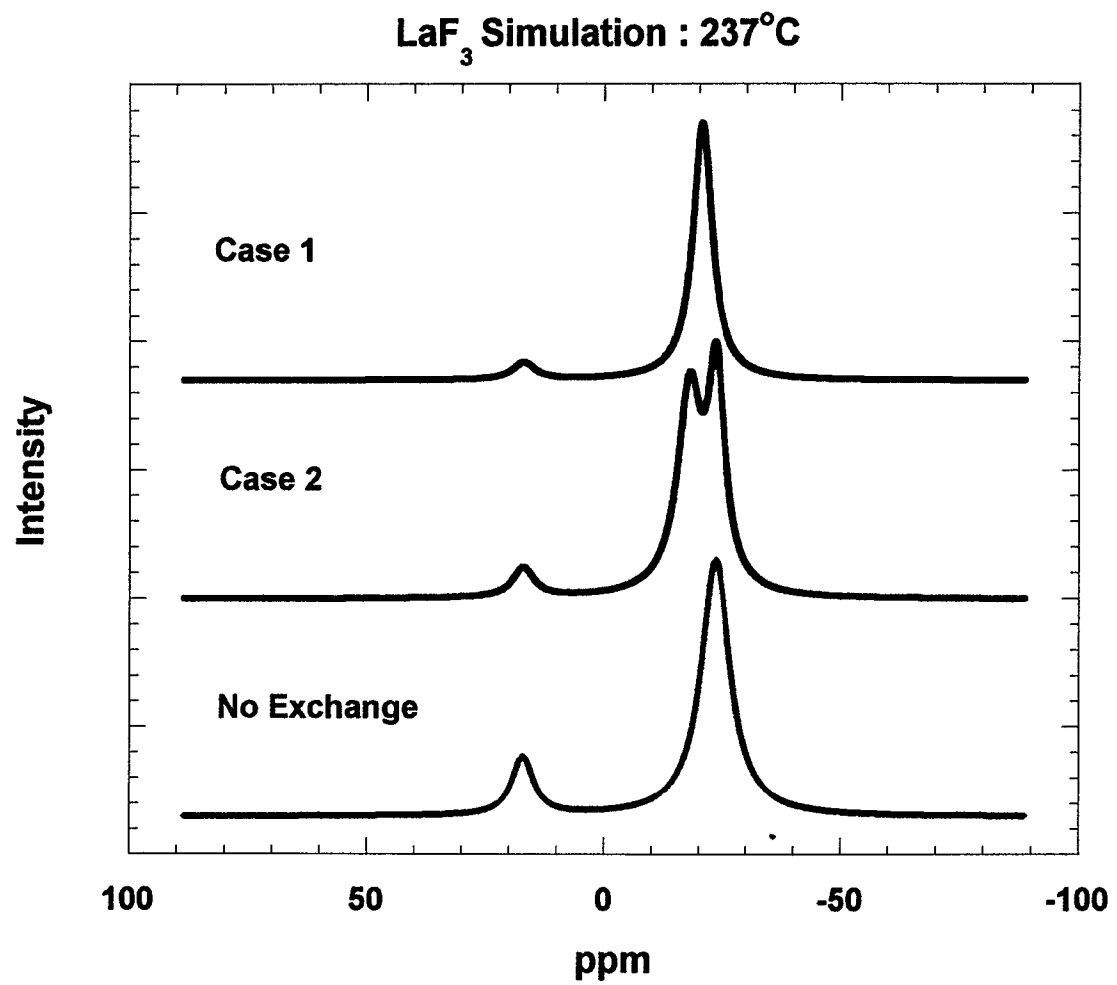

Supplement: Supplementary file 1 [file 5682690]
